# Supplementary material for: Modulation of Cell-Cycle Progression by Hydrogen Peroxide-Mediated Cross-Linking and Degradation of Cell-Adhesive Hydrogels
Source: Cells. 2022 Mar 3;11(5):881. doi: 10.3390/cells11050881 (PMC8909037; doi:10.3390/cells11050881)
Supplement: Supplementary file 1 [file cells-11-00881-s001.zip › Supplementary Information.pdf]

Supplementary Information

# Modulation of Cell-Cycle Progression by Hydrogen Peroxide-Mediated Cross-Linking and Degradation of Cell-Adhesive Hydrogels

Wildan Mubarak, Kelum Chamara Manoj Lakmal Elvitigala, Masaki Nakahata, Masaru Kojima and Shinji Sakai\*

Department of Materials Engineering Science, Graduate School of Engineering Science, Osaka University, Toyonaka, Osaka 560-8531, Japan

\*Correspondence: sakai.shinji.es@osaka-u.ac.jp; Tel.: +81-6-6850-6252

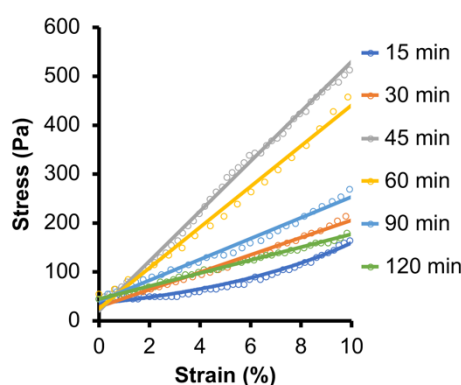

**Figure S1.** Stress–strain curves of Gelatin–Ph/HA–Ph hydrogel obtained from 3.0 *w/v*% Gelatin–Ph + 0.5 *w/v*% HA–Ph and 1 U/mL HRP exposed with various air containing H<sub>2</sub>O<sub>2</sub> exposure time.

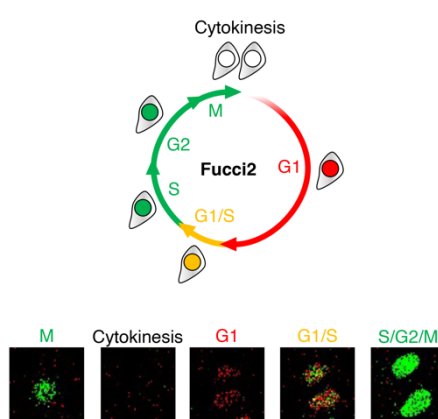

**Figure S2.** Diagram of the Fucci2 expression and representative confocal laser-scanning microscope observation of the Fucci2 expression. mCherry-hCdt1 is expressed in G1 phase shown as red fluorescence, mVenus-hGem expressed in late S/G2/M phase, and G1/S transition observed as yellow fluorescence (co-expression of red and green). Scale bar: 10  $\mu$ m.

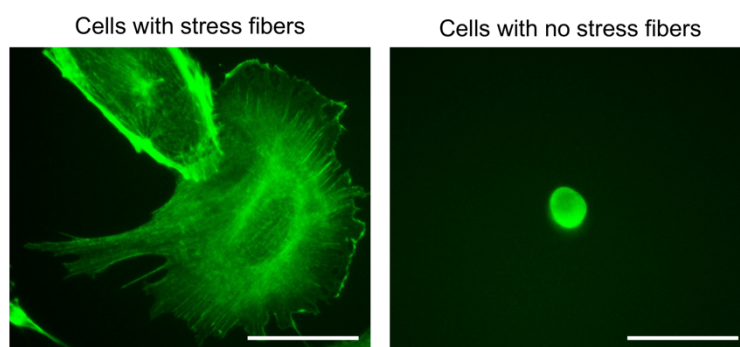

**Figure S3.** Representative image of cells with stress fibers and no stress fibers. Cells with stress fibers are characterized by the visible fibers in the cell's cytoplasm and nucleus. Cells: NMuMG/Fucci2 cells. Scale bars: 50  $\mu$ m.

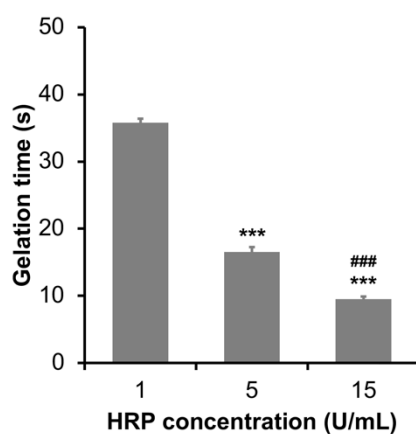

**Figure S4.** Gelation time of 3.0 *w/v*% Gelatin-Ph / 0.5 *w/v*% HA-Ph solutions containing 1, 5, and 15 U/mL HRP exposed to air containing  $H_2O_2$ . Bar: S.E. ( $n=5$ ). \*\*\* $p < 0.0005$ , compared to 1 U/mL, ### $p < 0.0005$  compared to 5 U/mL, Tukey HSD.

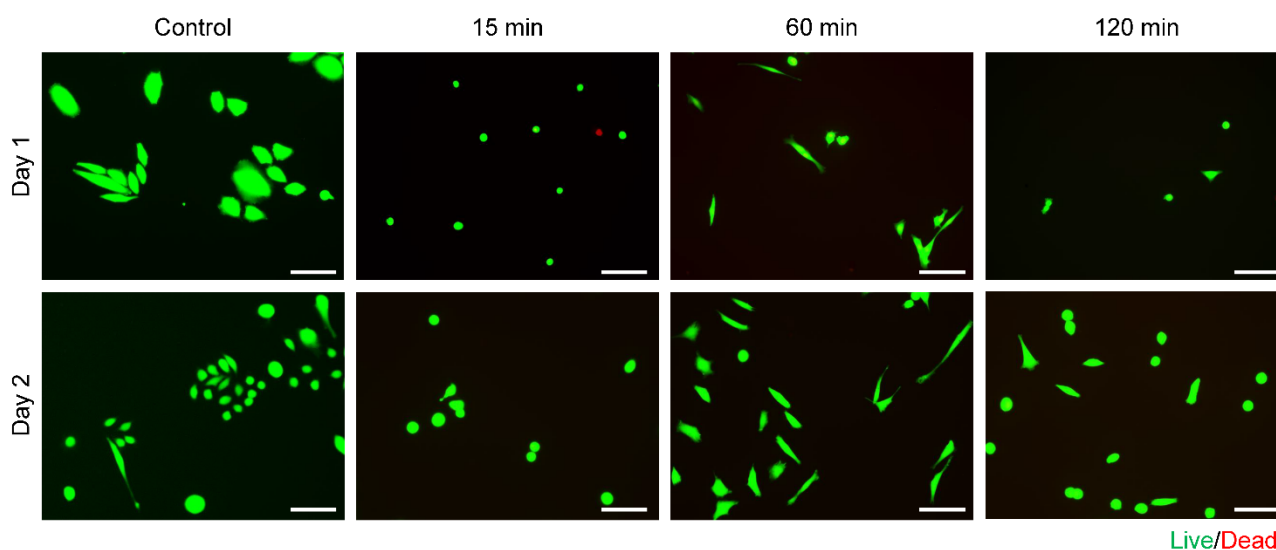

**Figure S5.** HeLa/Fucci2 cells stained with Calcein-AM (green) and propidium iodide (PI, red) indicating live and dead cells, respectively. Scale bar: 100  $\mu$ m.

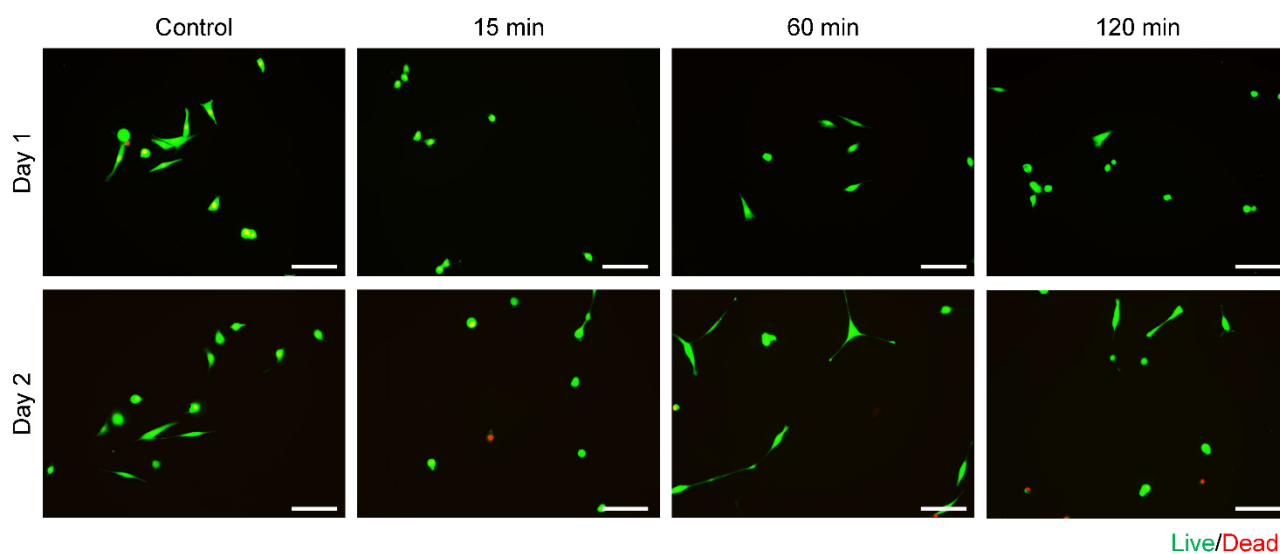

**Figure S6.** Fluorescence micrograph of live and dead NMuMG/Fucci2 cells stained with Calcein-AM and PI. Scale bar: 100  $\mu m$ .

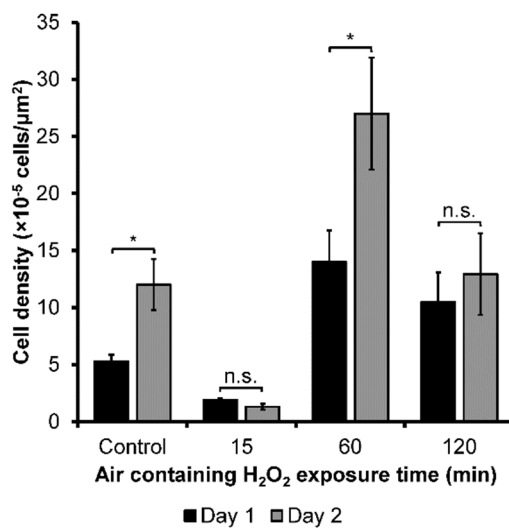

**Figure S7.** Density of HeLa/Fucci2 cells on Gelatin-Ph/H A-Ph composite hydrogel obtained from different  $H_2O_2$  exposure time. Bar: S.E. ( $n=5$ ). \* $p < 0.05$ , n.s.: no significant difference ( $p > 0.05$ ), Tukey HSD.

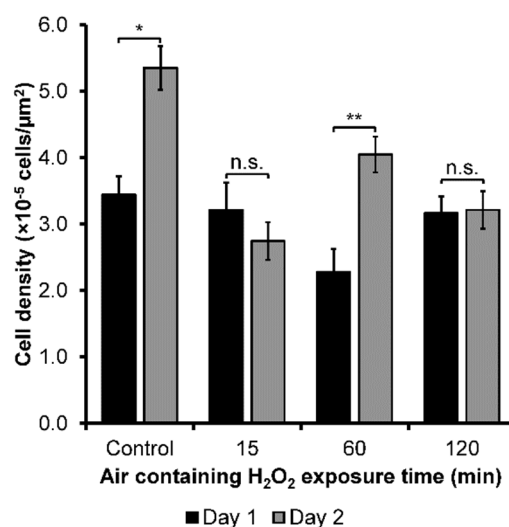

**Figure S8.** NMuMG/Fucci2 cell density cultured on Gelatin-Ph/HA-Ph hydrogel obtained from varying H<sub>2</sub>O<sub>2</sub> exposure time. Bar: S.E. ( $n=5$ ). \* $p<0.05$ , \*\* $p<0.005$ , n.s.: no significant difference, Tukey HSD.

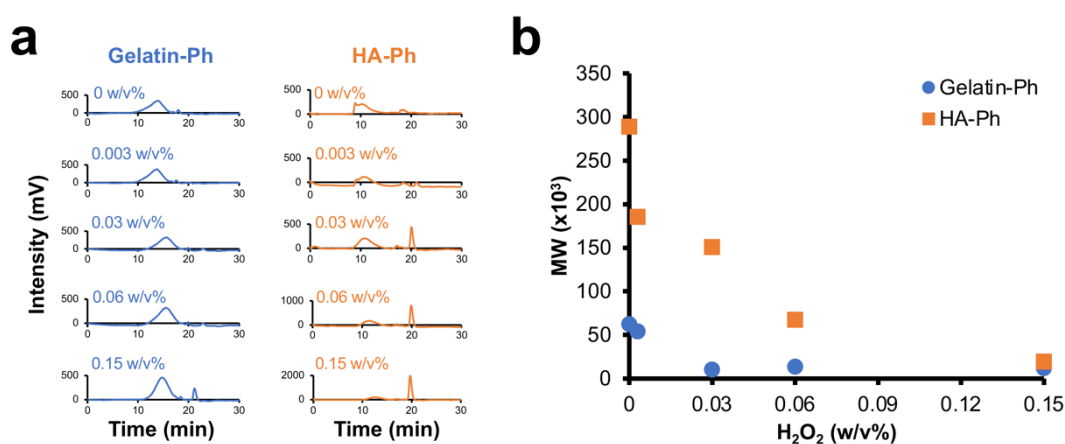

**Figure S9.** Degradation of Gelatin-Ph and HA-Ph polymer by H<sub>2</sub>O<sub>2</sub>. (a) Intensity-time curve of 3.0 w/v% Gelatin-Ph and 0.5 w/v% HA-Ph treated by 0%, 0.003%, 0.03%, 0.06% and 0.15% (w/v%) H<sub>2</sub>O<sub>2</sub> solution. (b) Peak top molecular weight, relative to the polyethylene glycol (standard), of 3.0 w/v% Gelatin-Ph and 0.5 w/v% HA-Ph after overnight incubation with H<sub>2</sub>O<sub>2</sub>. LC conditions: separation was performed on a SHIMADZU HPLC system equipped with Shodex OHpak SB-804 HQ, 8.0 mmID x 300 mmL column; mobile phase PBS at pH 7.4; flow rate, 0.7 mL/min; temperature, 25°C.

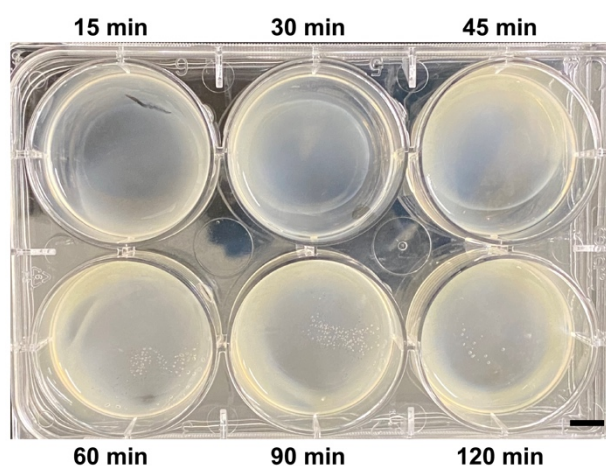

**Figure S10.** Phase separation in Gelatin-Ph/HA-Ph composite hydrogel fabricated after exposure to H<sub>2</sub>O<sub>2</sub> for 15 to 120 min. Notice the cloudy appearance of the hydrogel in extended exposure time, indicating phase-separation occurrence. Scale bar: 5 mm.
